# Supplementary material for: The Mott–Schottky Co2P/Co heterocatalyst encapsulated by N,P-doped graphene/carbon nanotubes as high-efficiency trifunctional electrocatalysts for cable-type flexible Zn–air batteries and water splitting
Source: Royal Society of Chemistry journal article supplement (doi:10.1039/d3ta05029g), 2023-12-12
Supplement: d3ta05029g2.pdf [file d3ta05029g2.pdf]

**Supplementary information**

**The Mott–Schottky Co<sub>2</sub>P/Co heterocatalyst encapsulated N,P-doped graphene/carbon nanotubes as high-efficiency trifunctional electrocatalysts for cable-type flexible Zn–air batteries and water splitting**

*Quynh Phuong Ngo, Thanh Tuan Nguyen, Manjinder Singh, Nam Hoon Kim\*, Joong Hee*

*Lee\**

E-mail: nhk@jbnu.ac.kr, jhl@jbnu.ac.kr

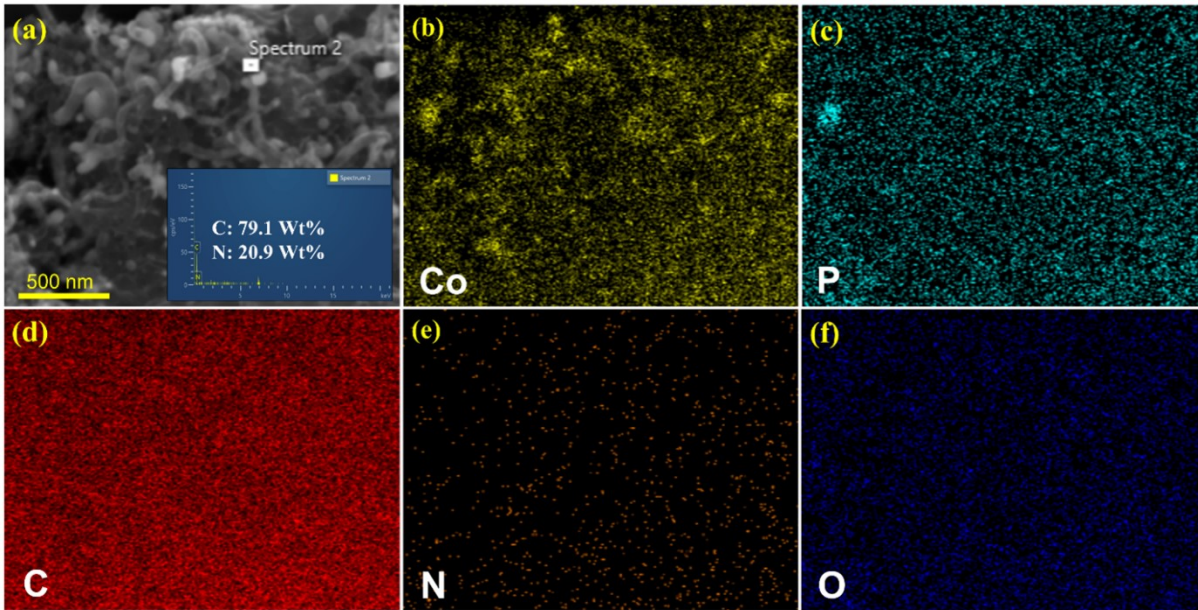

**Fig. S1.** (a) Overview FE-SEM and EDS color mapping of (b) Co, (c) P, (d) C, (e) N, (f) O elements and spectrum focus to N-CNT of  $\text{Co}_2\text{P}/\text{Co}@N\text{-CNT}/\text{NPG}$  nanohybrid.

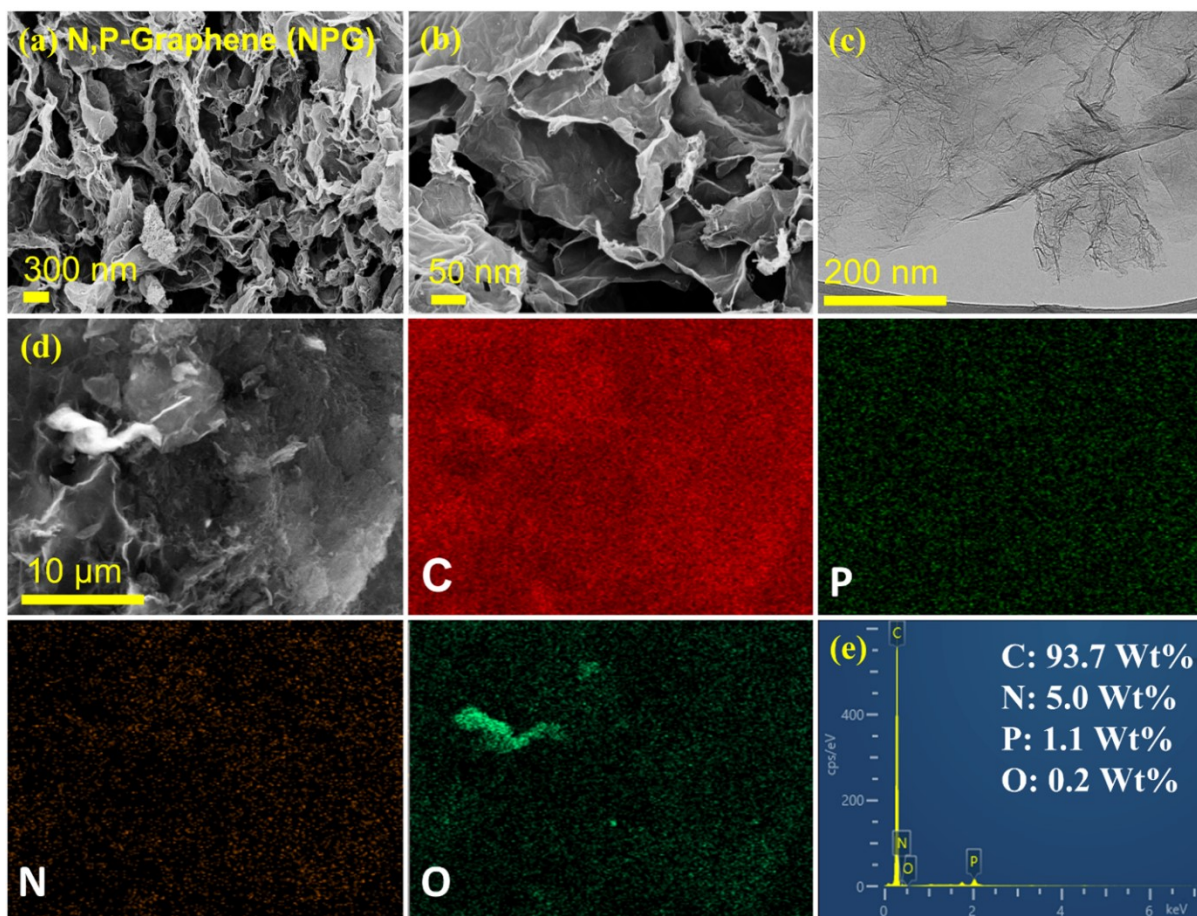

**Fig. S2.** (a,b) FE-SEM images, (c) TEM image, (d) Corresponding color mapping images of C, P, N, O elements, and (e) EDS of NPG.

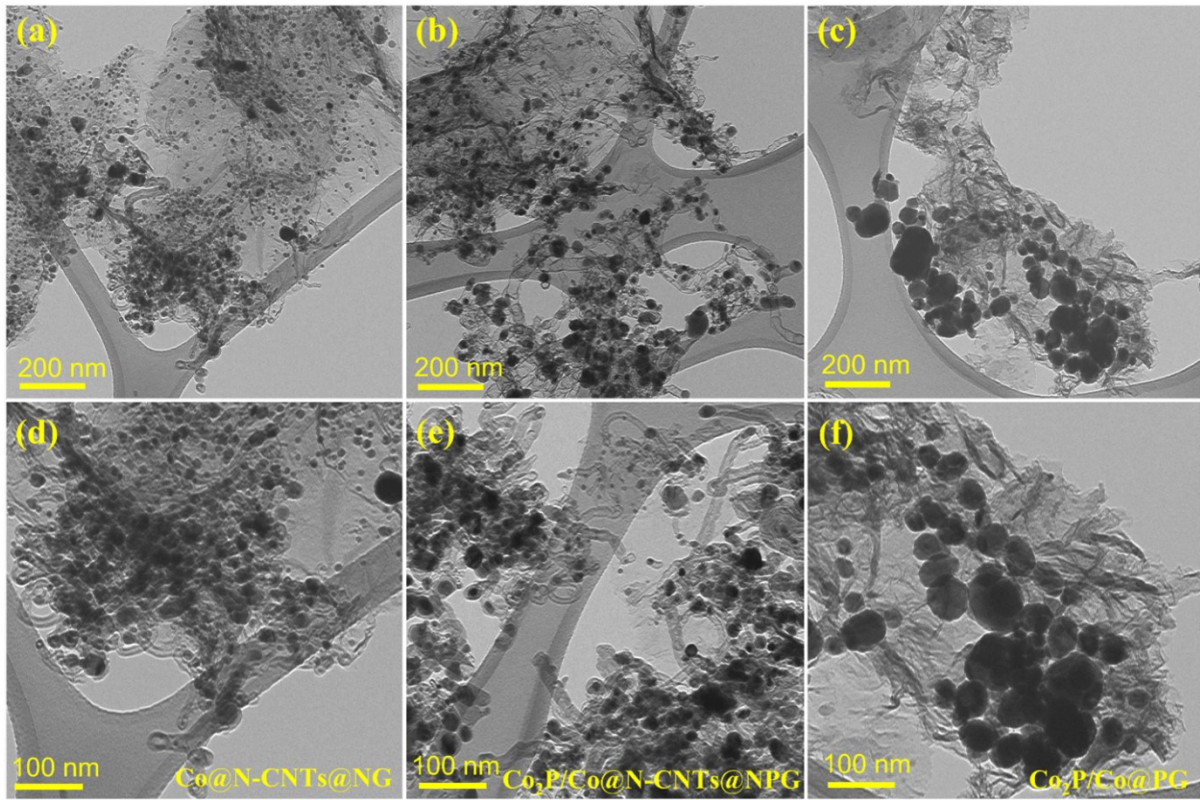

**Fig. S3.** TEM images of (a,d) Co@N-CNT/NG, (b,e) Co<sub>2</sub>P/Co@N-CNT/NPG, and (c,f) Co<sub>2</sub>P/Co@PG.



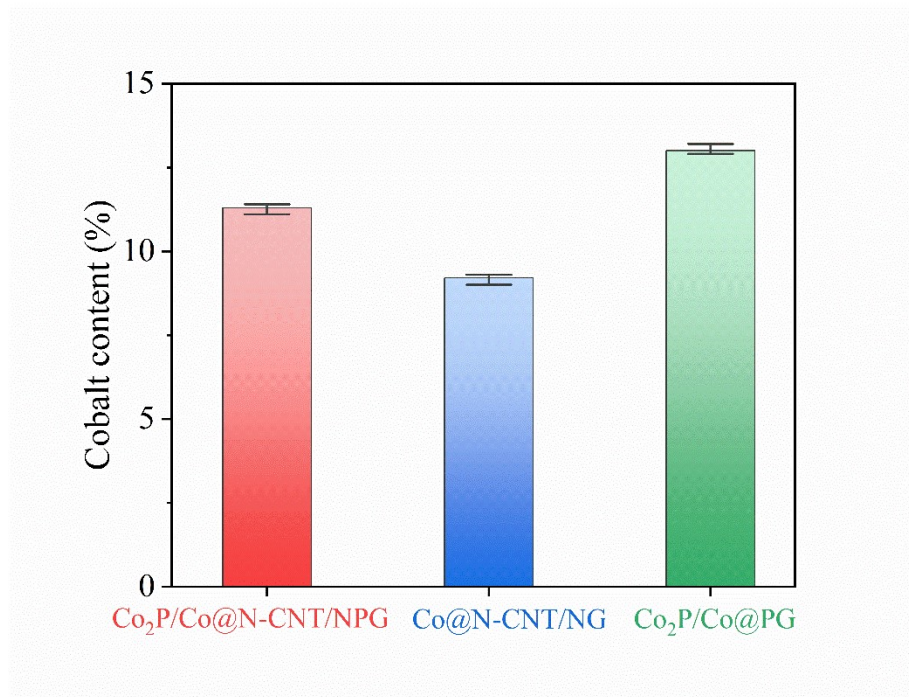

**Fig. S4.** The ICP-AES result of Co<sub>2</sub>P/Co@N-CNT/NPG, Co@N-CNT/NG, and Co<sub>2</sub>P/Co@PG.

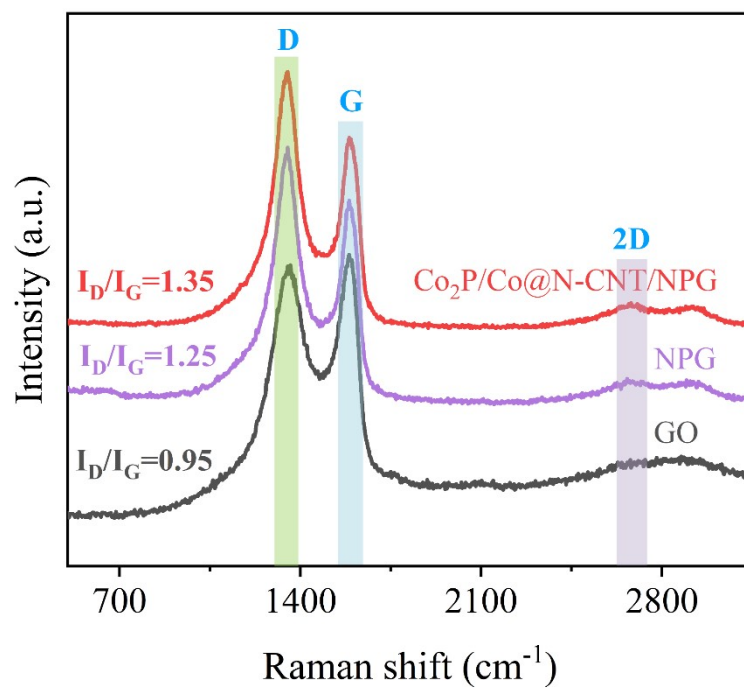

**Fig. S5.** Raman spectrum of  $\text{Co}_2\text{P/Co@N-CNT/NPG}$ , NPG, and GO.

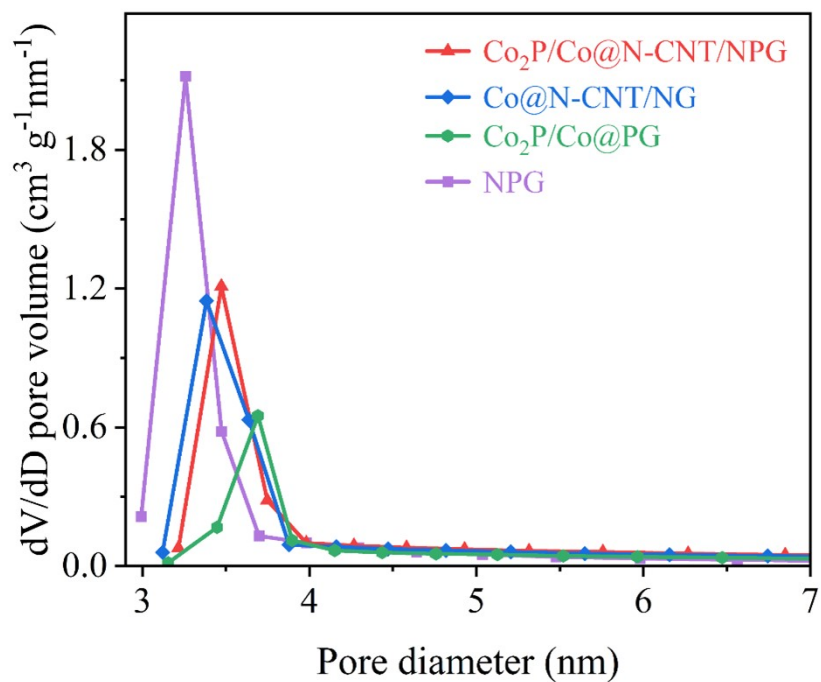

**Fig. S6.** Pore size distribution diagram of Co<sub>2</sub>P/Co@N-CNT/NPG, Co@N-CNT/NG, Co<sub>2</sub>P/Co@PG and NPG.

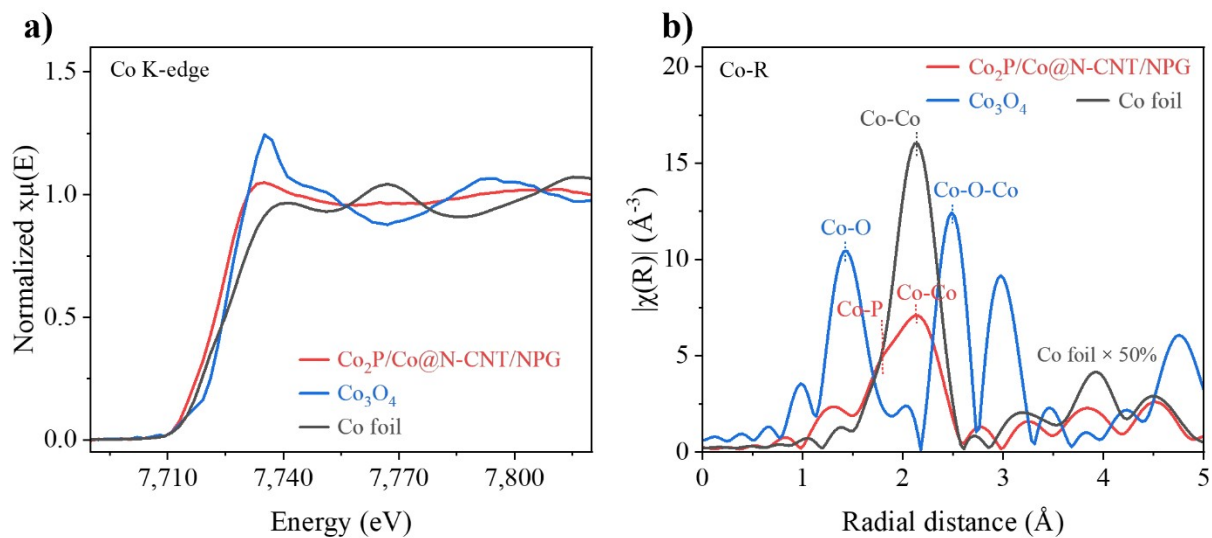

**Fig. S7.** XAS characterization. a) Co K-edge XANES curves and b) Fourier-transformed EXAFS spectra at the Co K-edge of  $\text{Co}_2\text{P}/\text{Co}@N\text{-CNT}/\text{NPG}$ ,  $\text{Co}_3\text{O}_4$ , and Co foil reference.



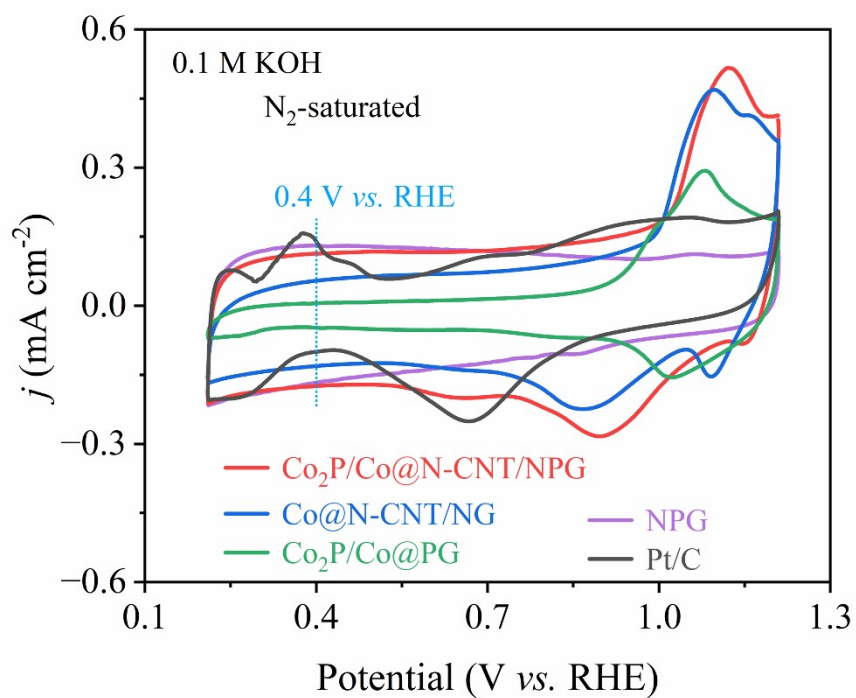

**Fig. S8.** The CV profiles of the synthesized materials at sweep rate of 5 mV s<sup>-1</sup> in N<sub>2</sub>-saturated 0.1 M KOH solution.

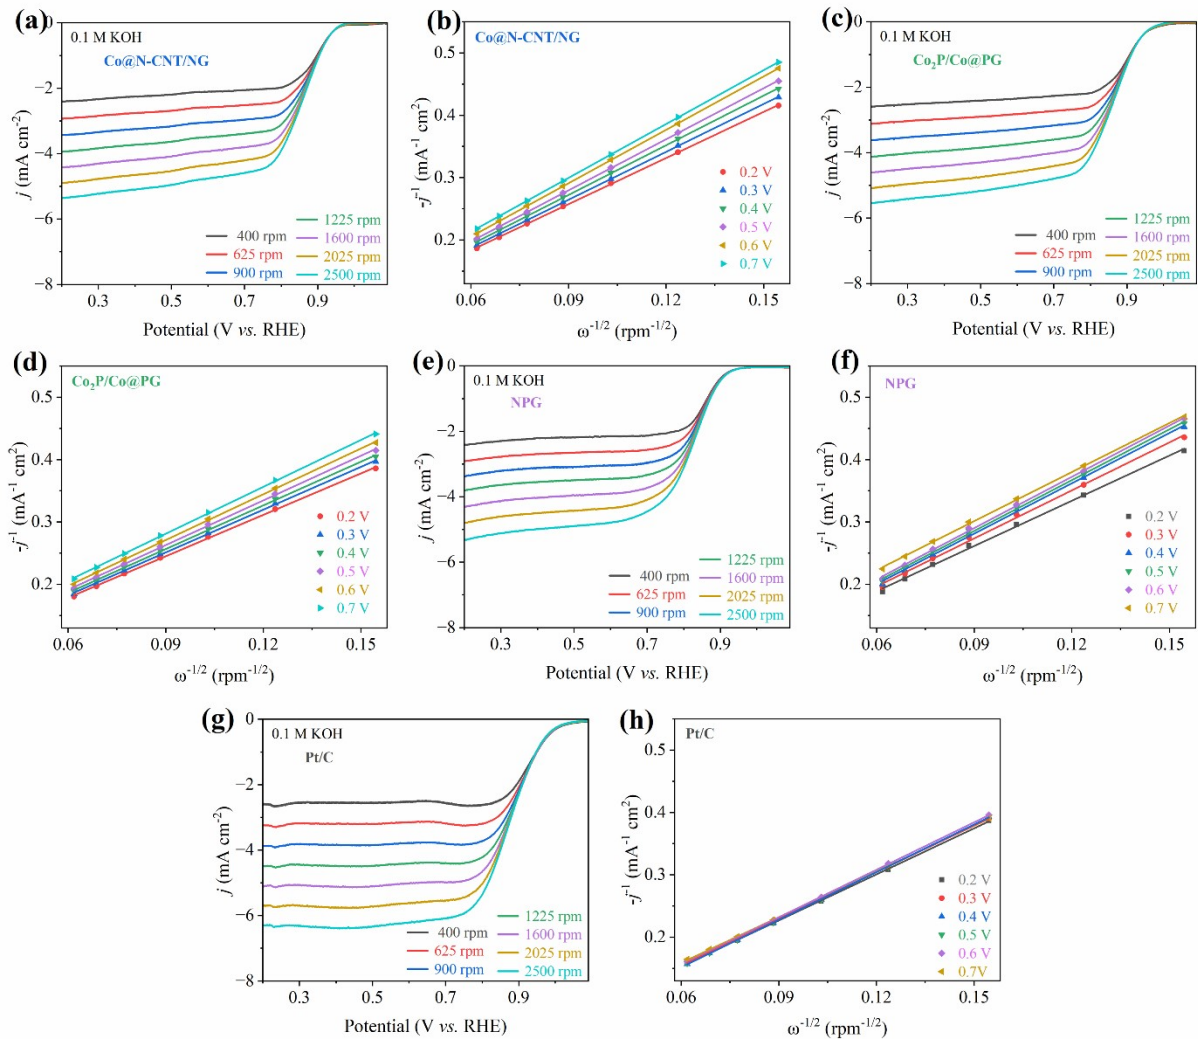

**Fig. S9.** LSV responses at various electrode rotation speeds and corresponding K-L plots in 0.1 M KOH aqueous solution with RDE: (a,b) Co@N-CNT/NG, (c,d) Co<sub>2</sub>P/Co@PG, (e,f) NPG, and (g,h) Pt/C.

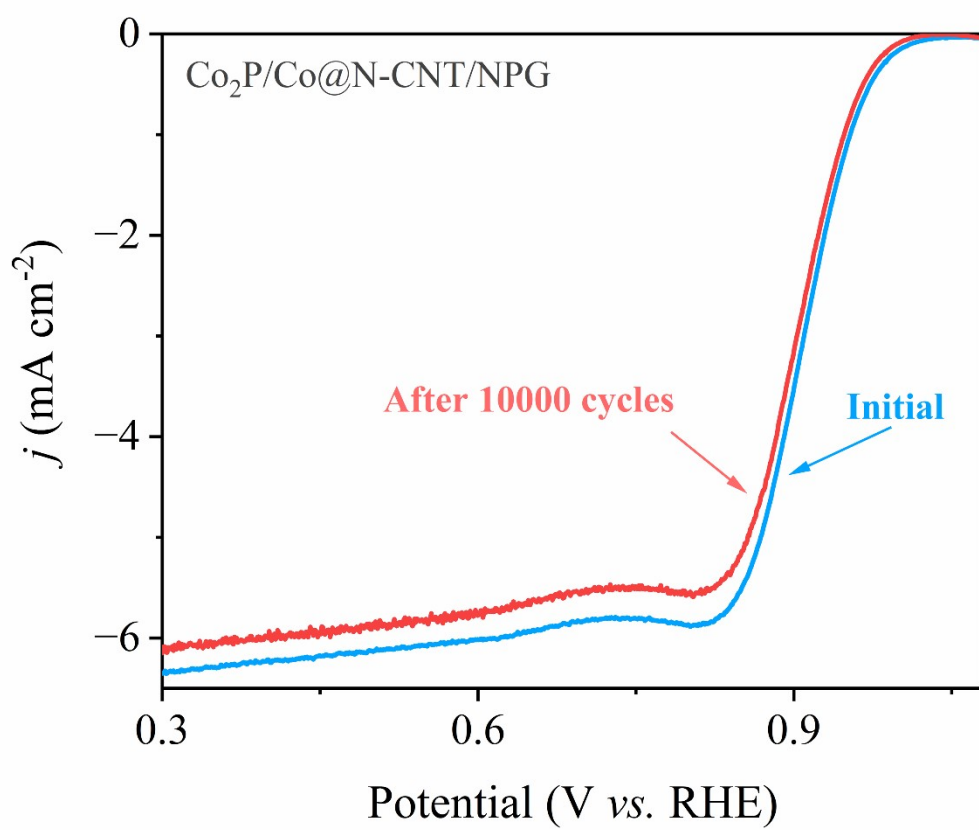

**Fig. S10.** ORR LSV polarization curves of Co<sub>2</sub>P/Co@N-CNT/NPG before and after 10,000 cycles.

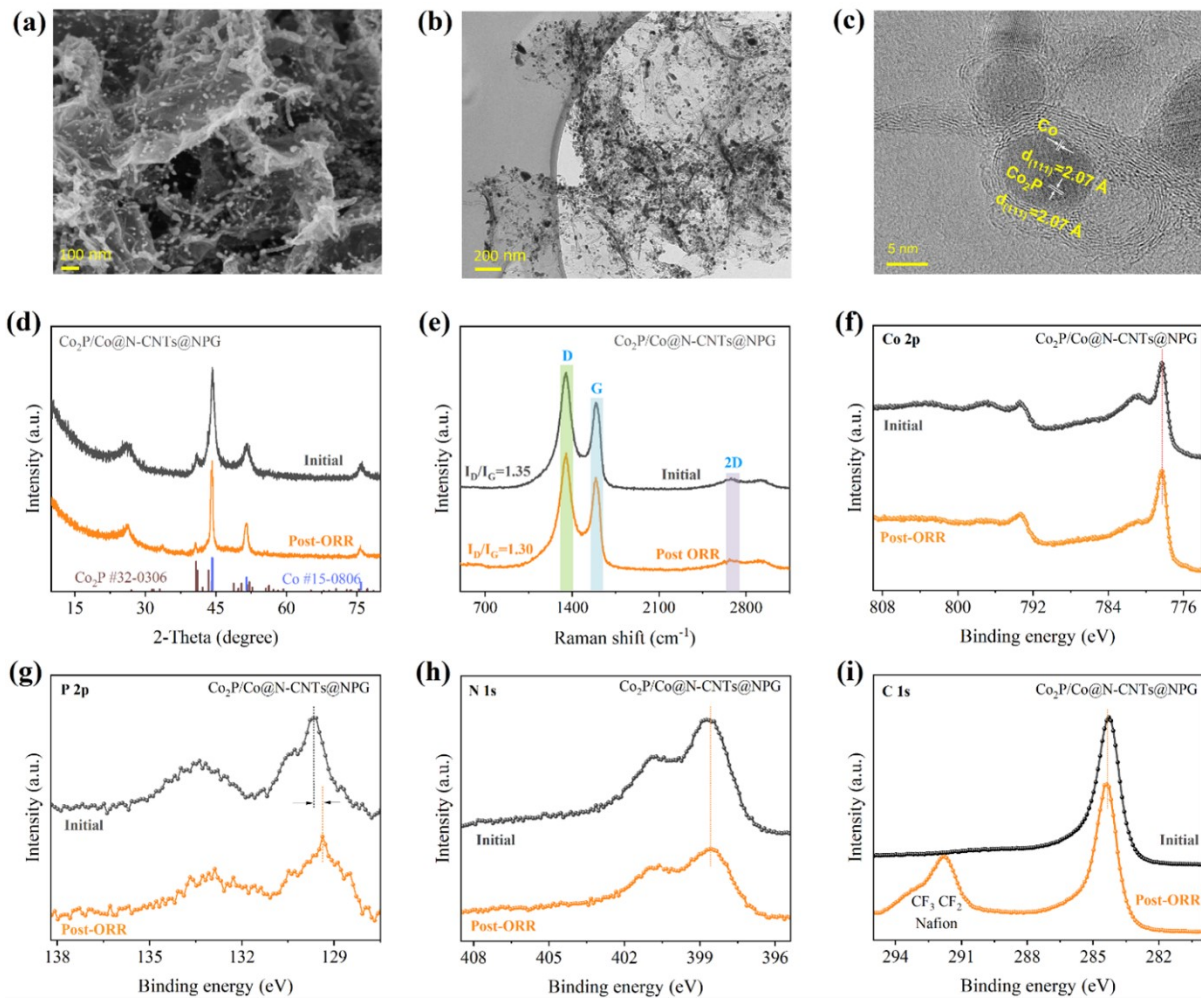

**Fig. S11.** (a) SEM and (b, c) TEM images at different magnification, (d) XRD patterns, (e) Raman spectra and XPS survey spectrum with high-resolution XPS spectra for (f) Co 2p, (g) P 2p, (h) N 1s, (i) C 1s of  $\text{Co}_2\text{P}/\text{Co}@N\text{-CNT}/\text{NPG}$  after ORR performance.

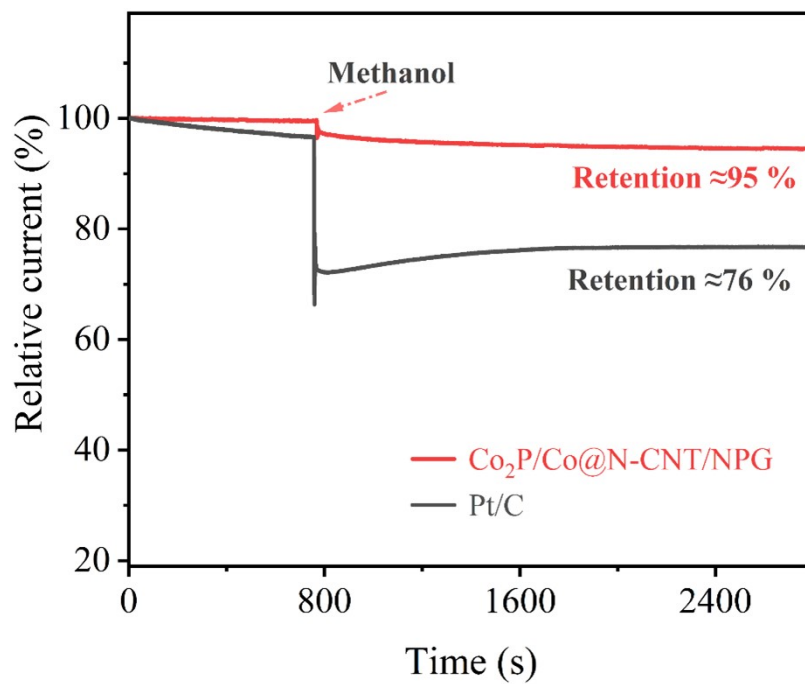

**Fig. S12.** The durability of Co<sub>2</sub>P/Co@N-CNT/NPG and Pt/C under the crossover effect of 3 M methanol.



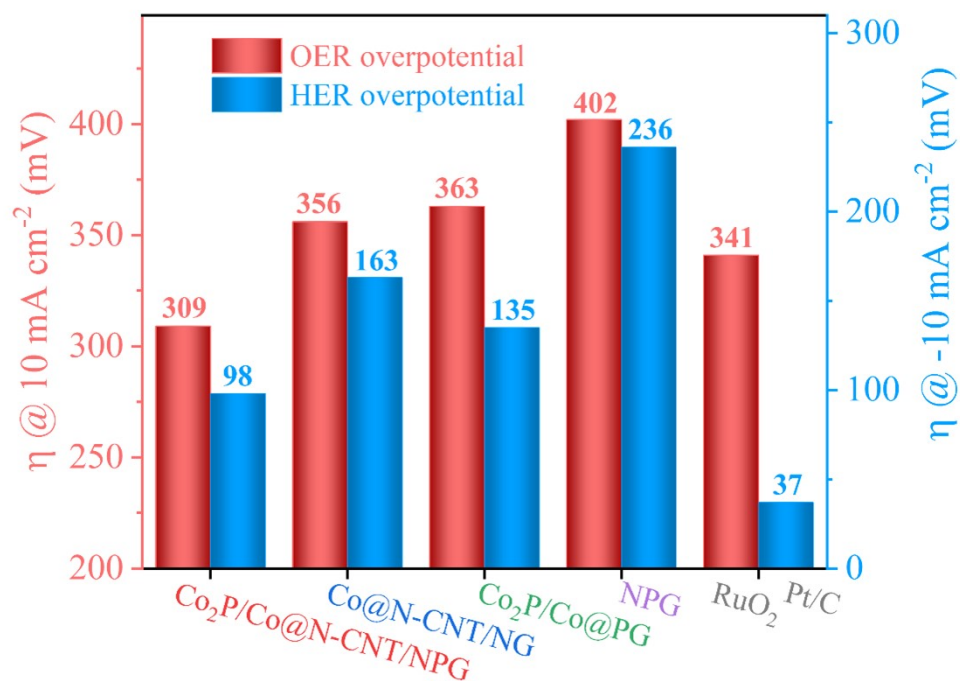

**Fig. S13.** The OER and HER overpotential comparison of Co<sub>2</sub>P/Co@N-CNT/NPG, Co@N-CNT/NG, Co<sub>2</sub>P/Co@PG, NPG, RuO<sub>2</sub> and Pt/C in 1 M KOH.

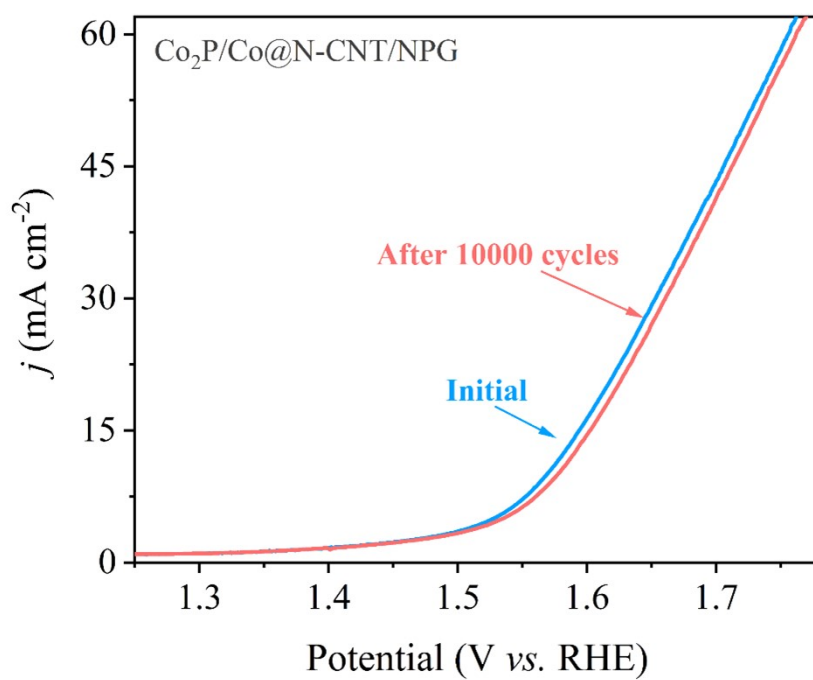

**Fig. S14.** OER LSV polarization curves of Co<sub>2</sub>P/Co@N-CNT/NPG before and after 10,000 cycles.

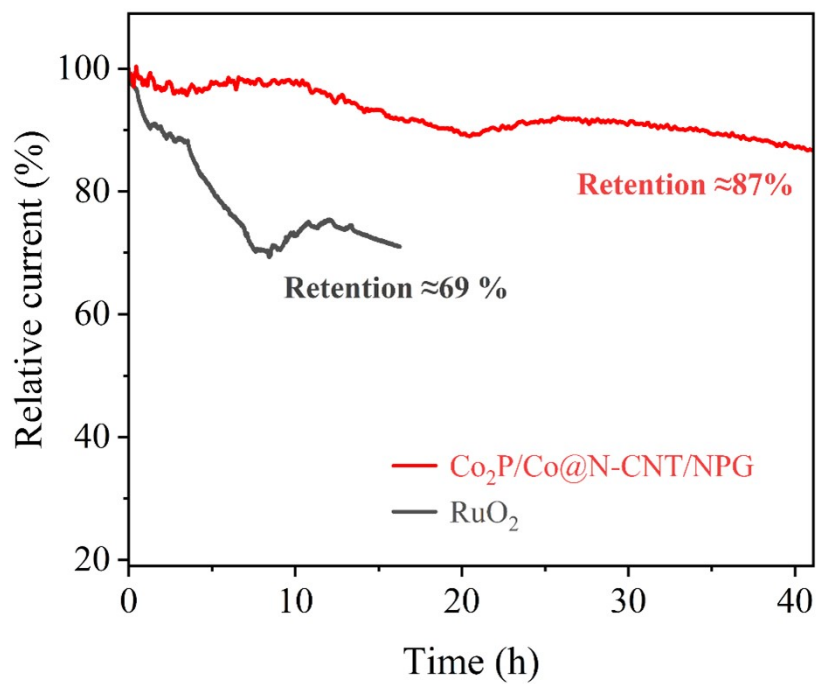

**Fig. S15.** Chronoamperometry stability of  $\text{Co}_2\text{P/Co@N-CNT/NPG}$  and  $\text{RuO}_2$  for a long-term OER operation.

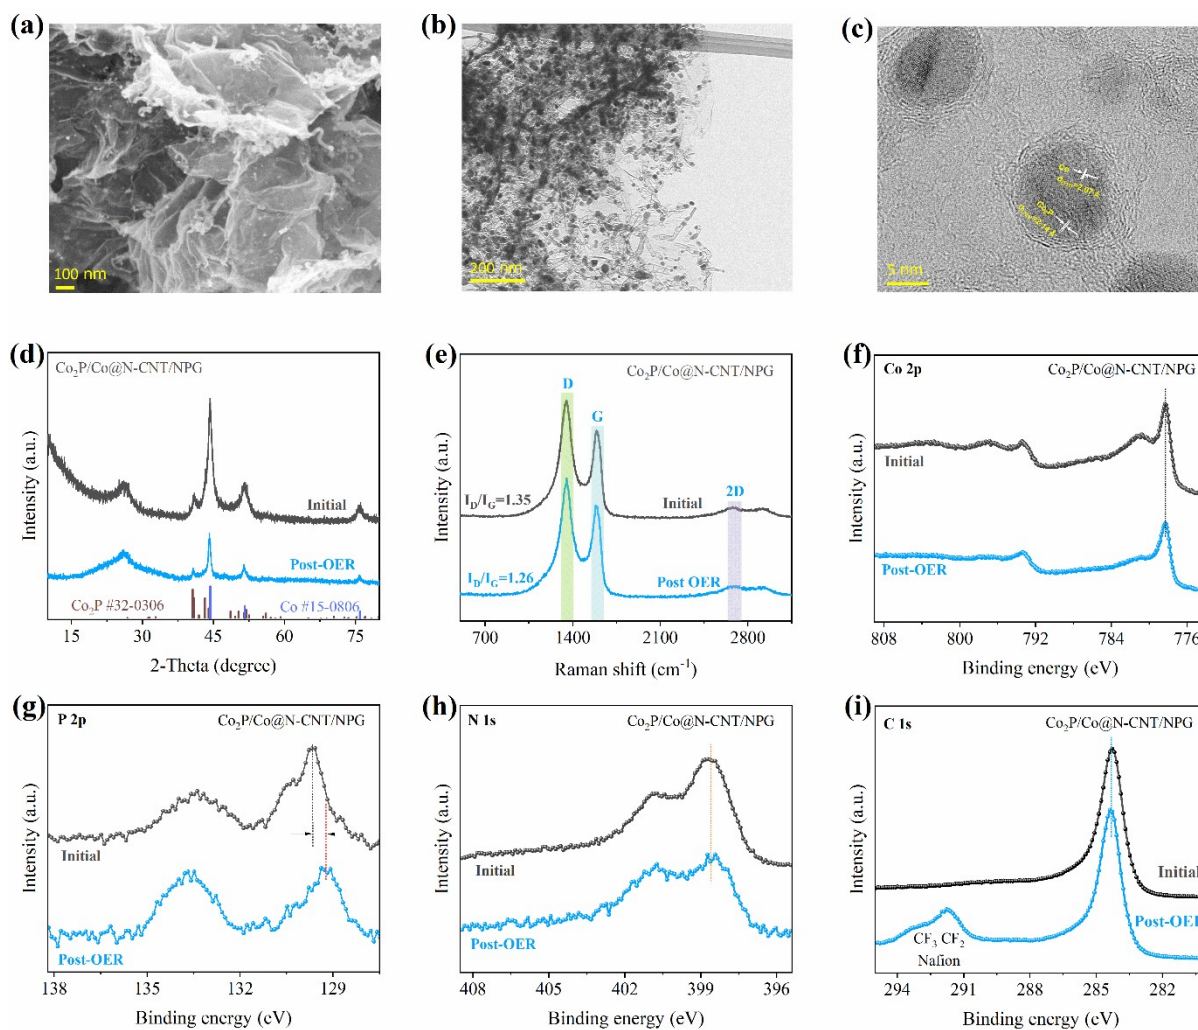

**Fig. S16.** (a) SEM and (b, c) TEM images at different magnification, (d) XRD patterns, (e) Raman spectra and XPS survey spectrum with high-resolution XPS spectra for (f) Co 2p, (g) P 2p, (h) N 1s, (i) C 1s of  $\text{Co}_2\text{P}/\text{Co}@N\text{-CNT}/\text{NPG}$  after OER performance.

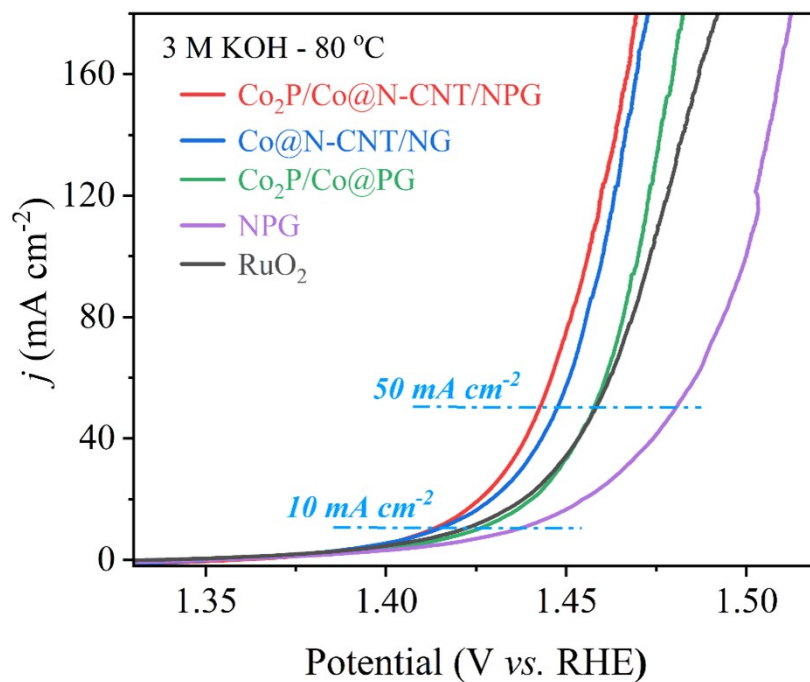

**Fig. S17.** OER LSV polarization curves of  $\text{Co}_2\text{P/Co@N-CNT/NPG}$ ,  $\text{Co@N-CNT/NG}$ ,  $\text{Co}_2\text{P/Co@PG}$ ,  $\text{NPG}$  and  $\text{RuO}_2$  in 3 M KOH at 80 °C.



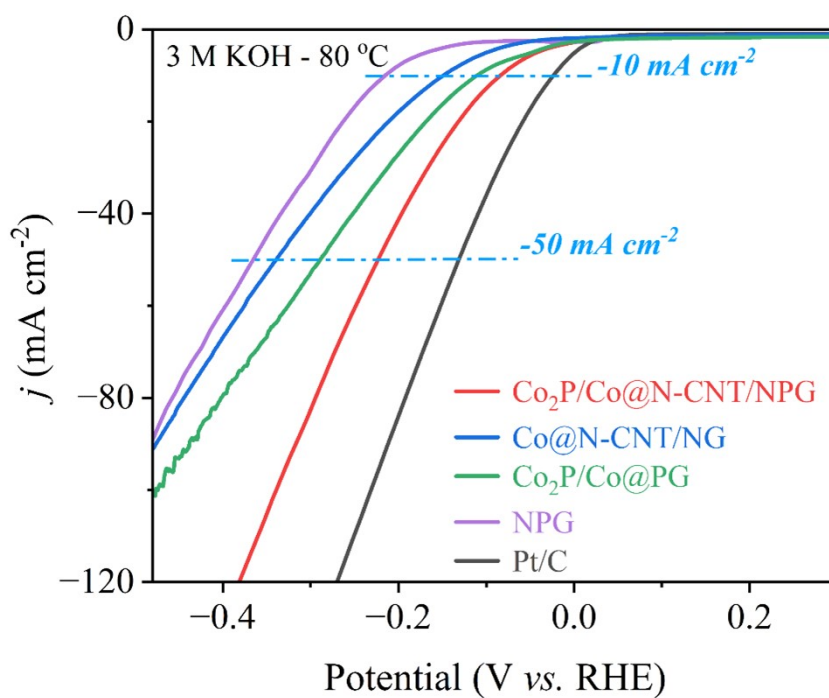

**Fig. S18.** HER LSV polarization curves of  $\text{Co}_2\text{P/Co@N-CNT/NPG}$ ,  $\text{Co@N-CNT/NG}$ ,  $\text{Co}_2\text{P/Co@PG}$ , NPG and  $\text{RuO}_2$  in 3 M KOH at 80 °C.

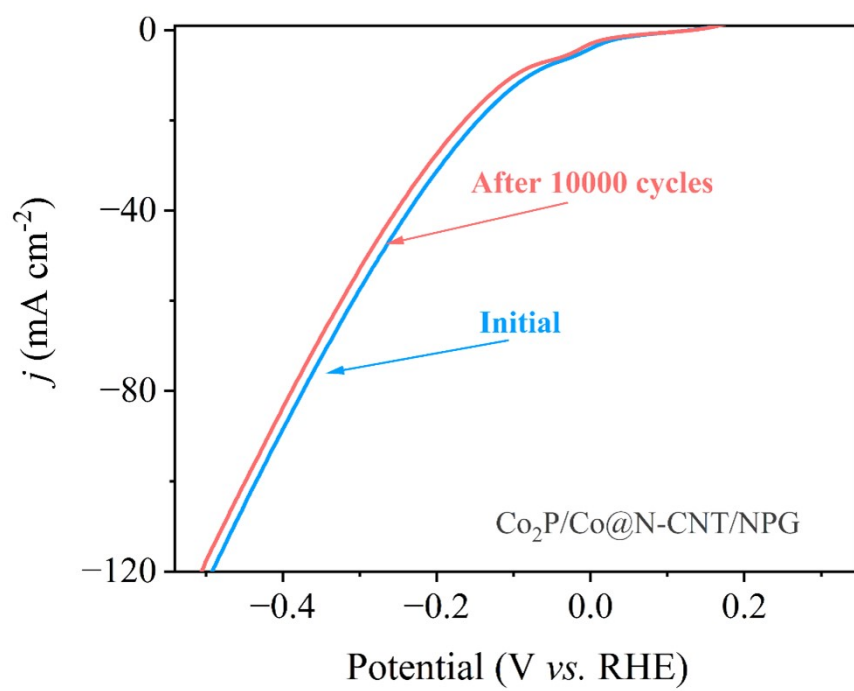

**Fig. S19.** HER LSV polarization curves of Co<sub>2</sub>P/Co@N-CNT/NPG before and after 10,000 cycles.

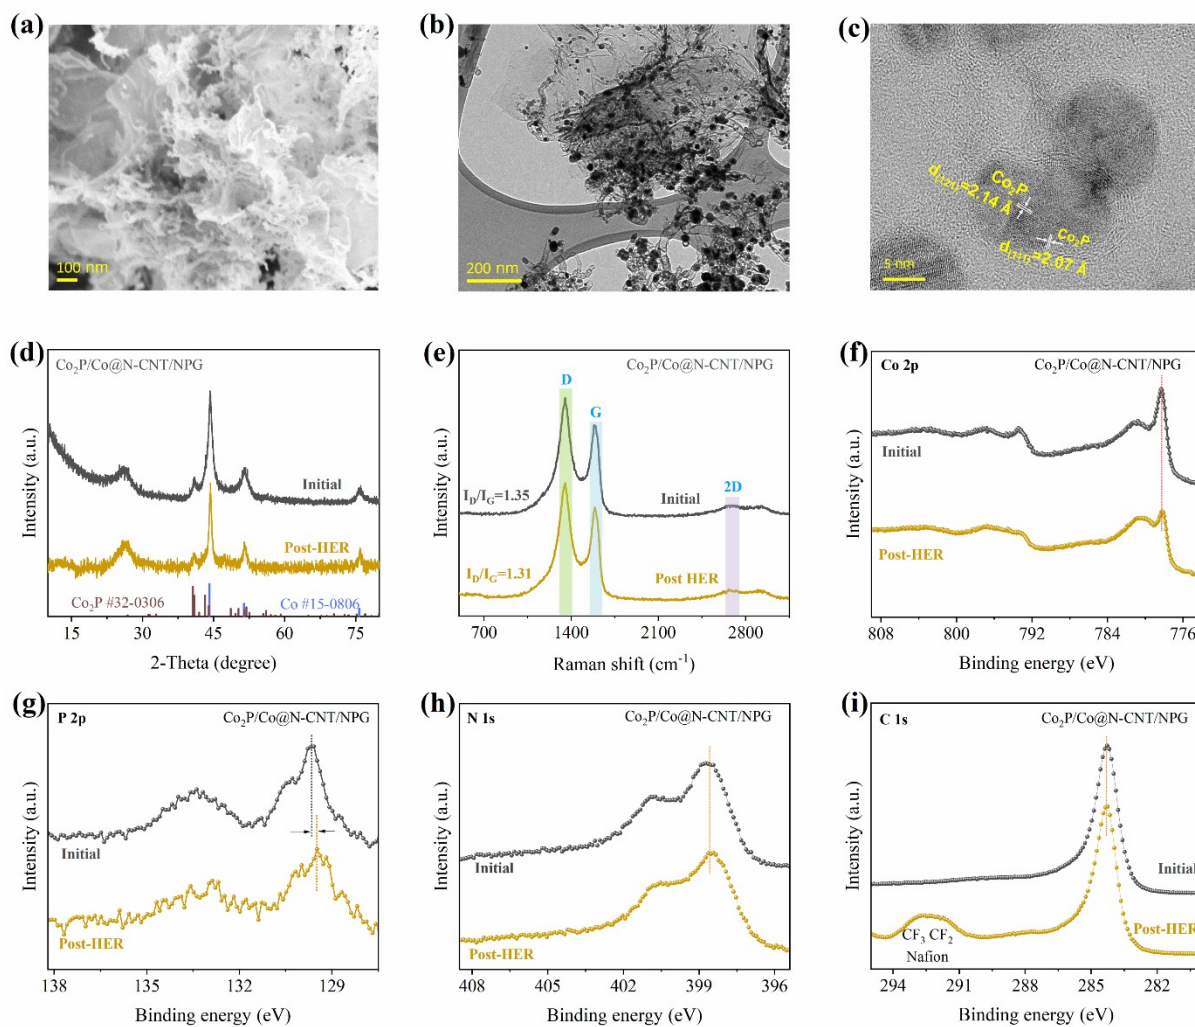

**Fig. S20.** (a) SEM and (b, c) TEM images at different magnification, (d) XRD patterns, (e) Raman spectra and XPS survey spectrum with high-resolution XPS spectra for (f) Co 2p, (g) P 2p, (h) N 1s, (i) C 1s of  $\text{Co}_2\text{P}/\text{Co}@N\text{-CNT}/\text{NPG}$  after HER performance.

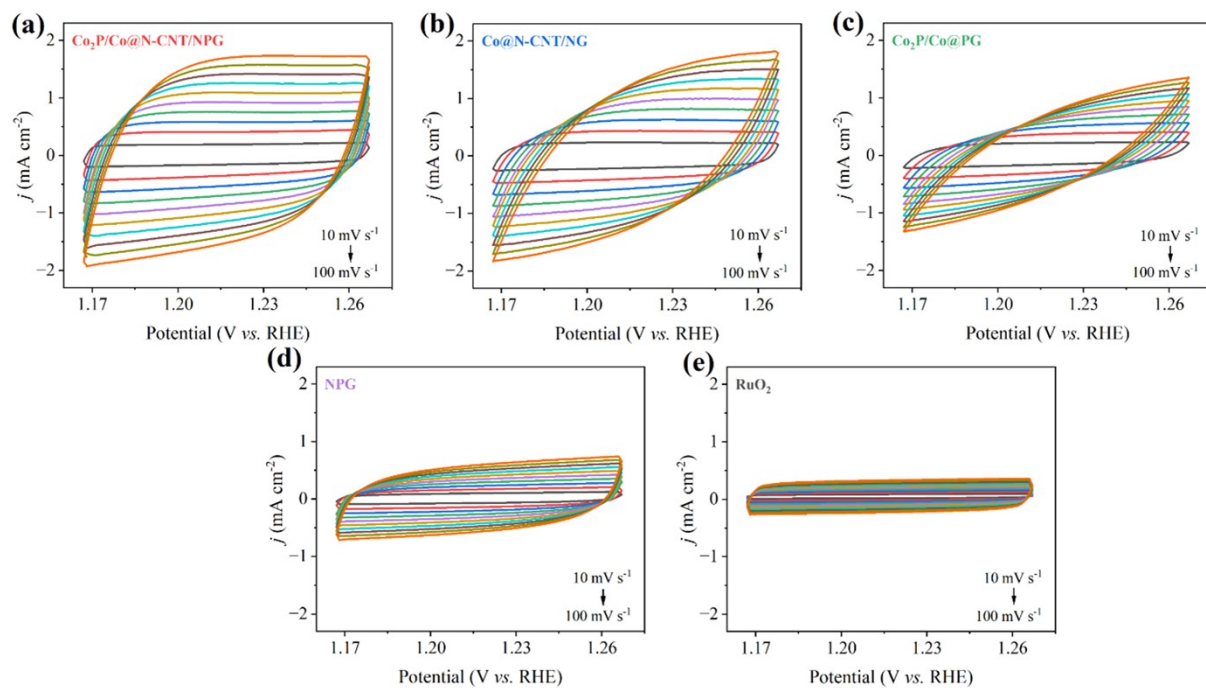

**Fig. S21.** CV curves of catalysts at various scan rates in 1 M KOH aqueous solution: (a)  $\text{Co}_2\text{P}/\text{Co}@N\text{-CNT}/\text{NPG}$ , (b)  $\text{Co}@N\text{-CNT}/\text{NG}$ , (c)  $\text{Co}_2\text{P}/\text{Co}@PG$ , (d) NPG, and (e)  $\text{RuO}_2$ .

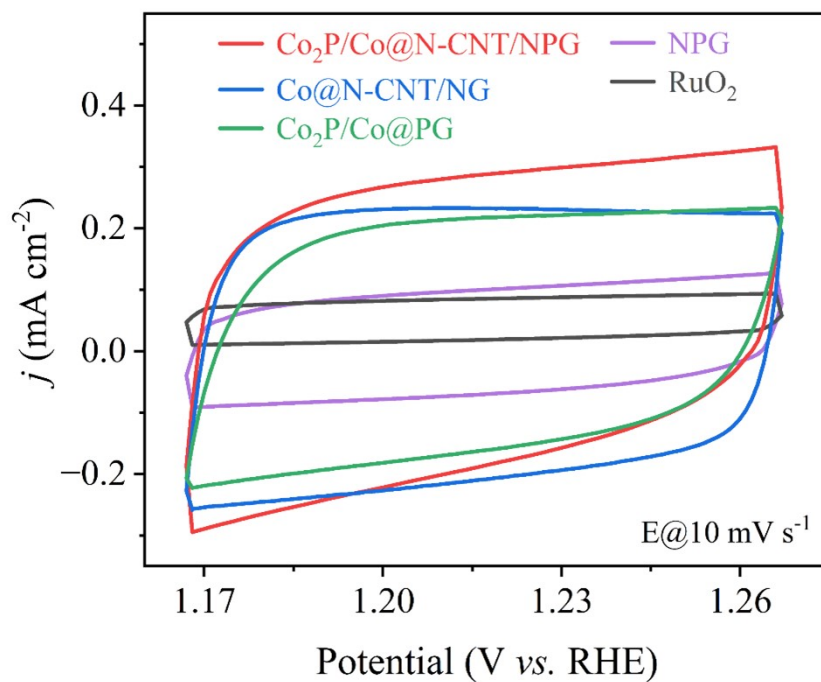

**Fig. S22.** CV measurement of different synthesized catalysts at a sweep rate of 10 mV s<sup>-1</sup>.



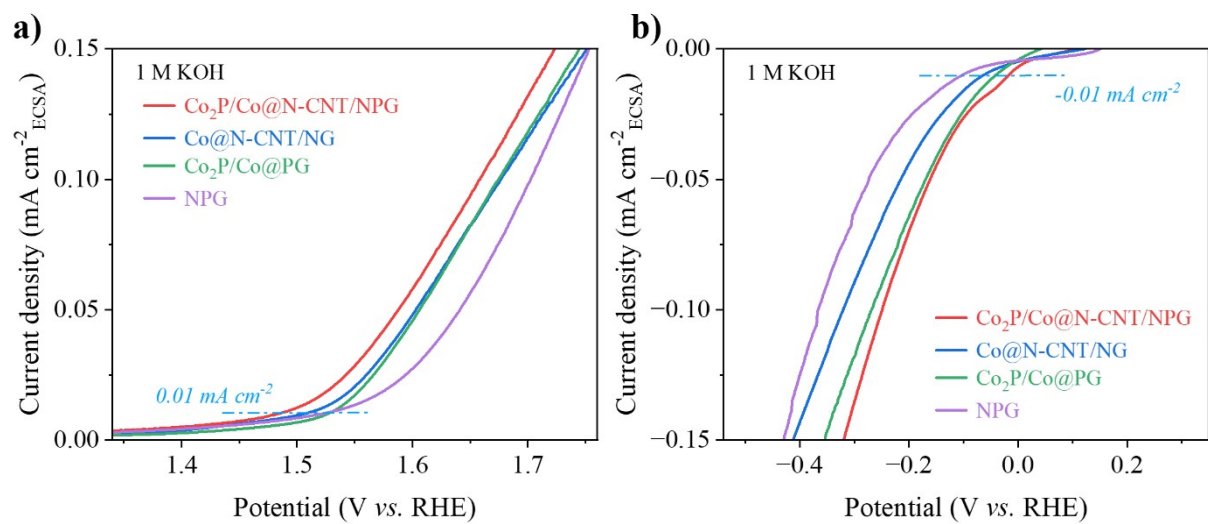

**Fig. S23.** ECSA-normalized LSV curves of as-prepared electrocatalysts for a) OER and b) HER.

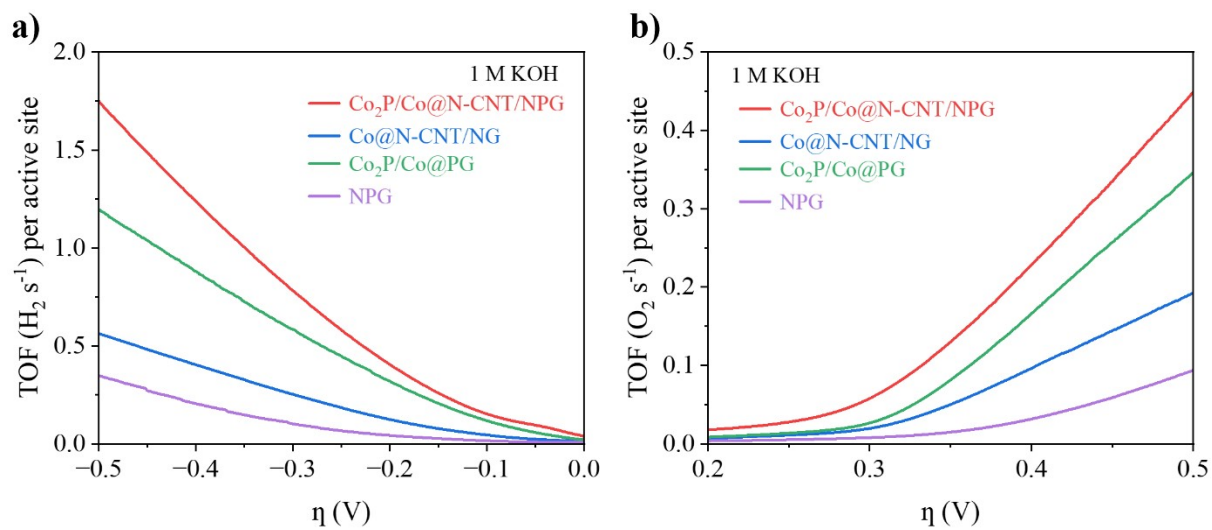

**Fig. S24.** TOF of as-prepared electrocatalysts for a) HER and b) OER.

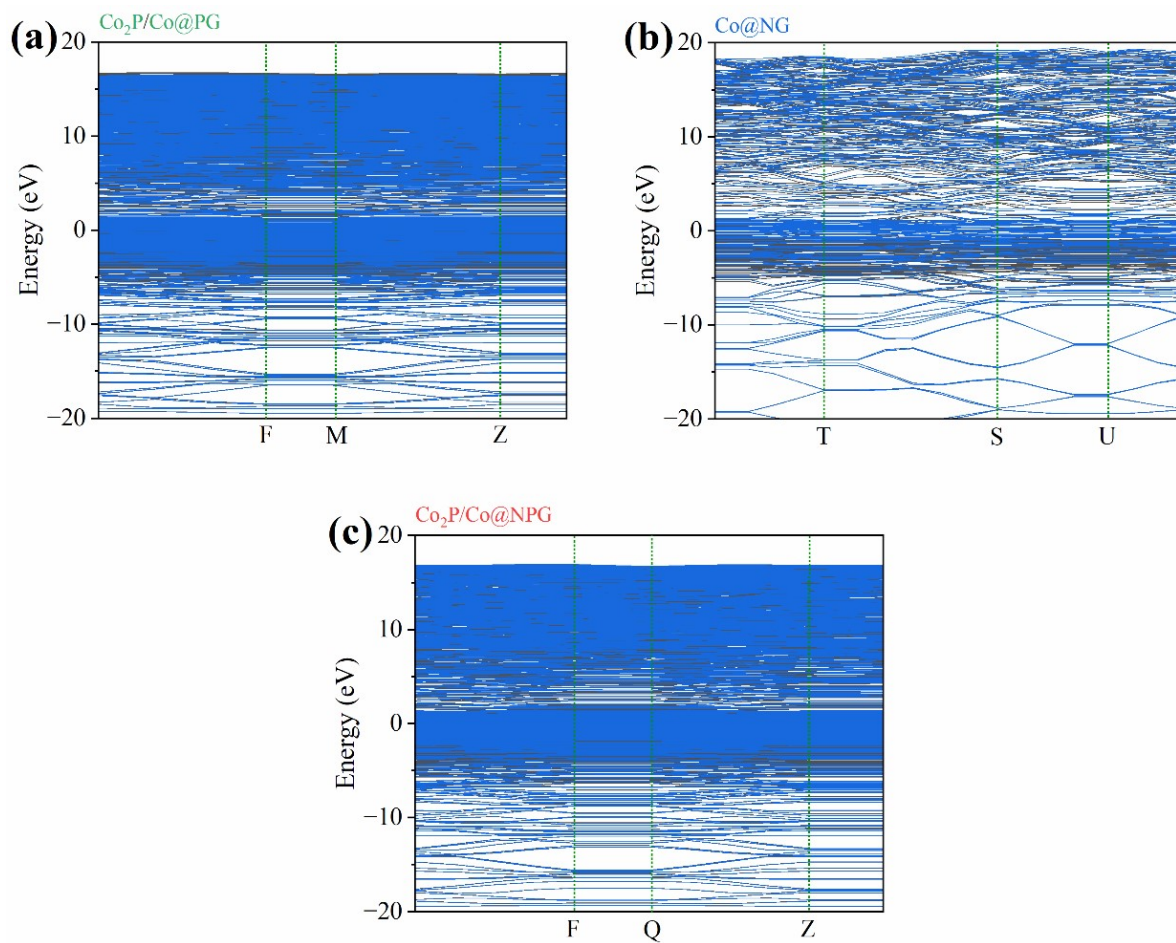

**Fig. S25.** The electronic band structure of  $\text{Co}_2\text{P}/\text{Co@PG}$ ,  $\text{Co@NG}$ , and  $\text{Co}_2\text{P}/\text{Co@NPG}$ .

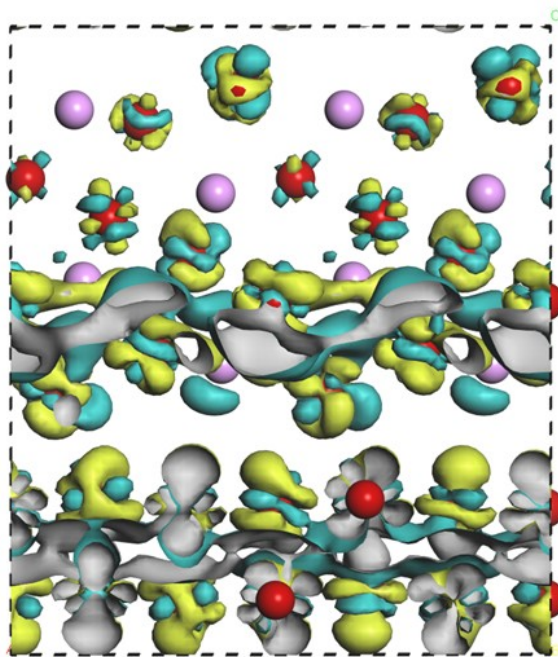

**Fig. S26.** Energy density difference calculation for Co<sub>2</sub>P/Co model.

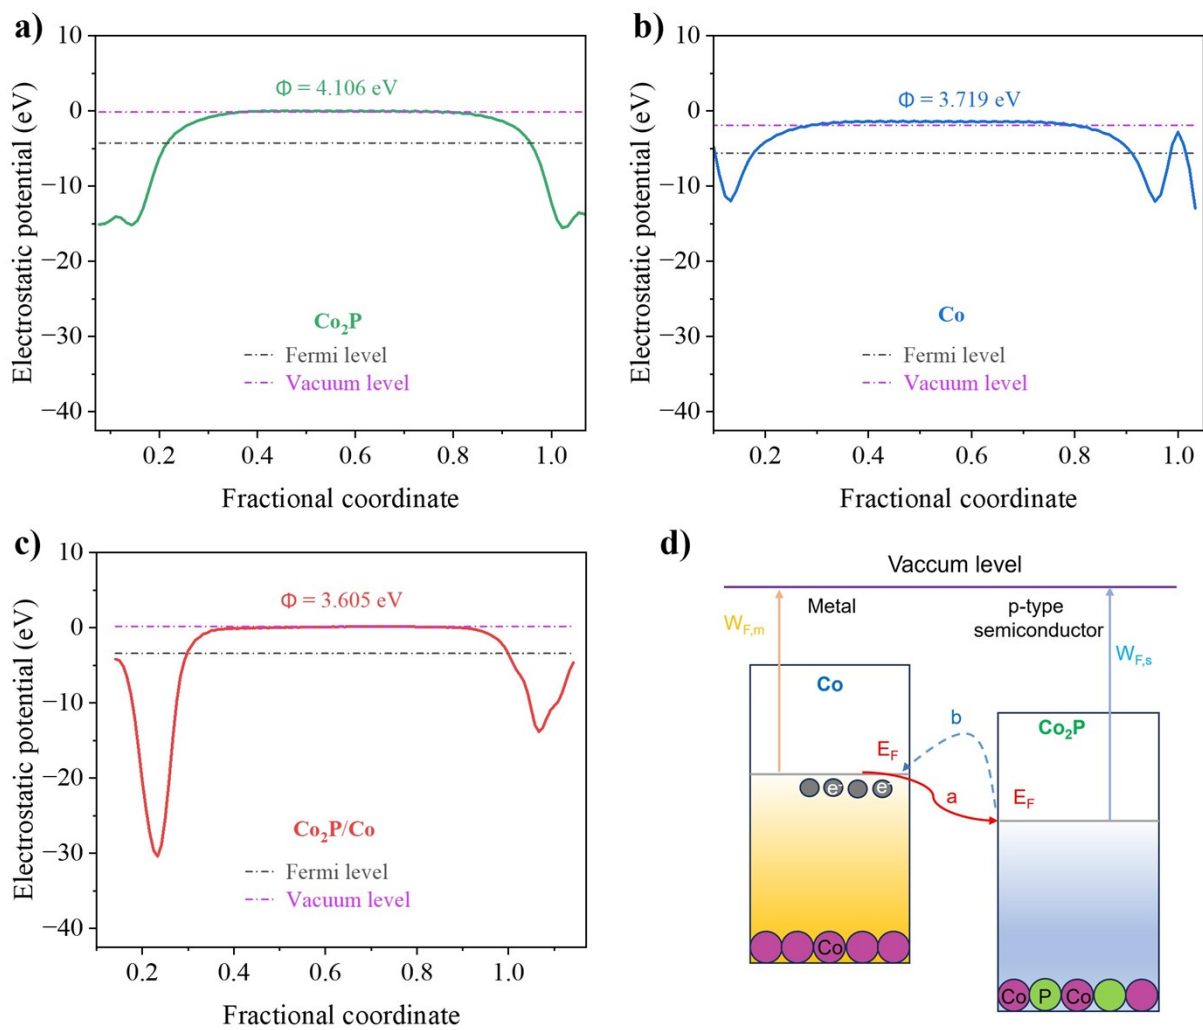

**Fig. S27.** (a-c) The calculation results for work function for  $\text{Co}_2\text{P}$ ,  $\text{Co}$  and  $\text{Co}_2\text{P}/\text{Co}$ , (d) Mott-Schottky model for the interaction between  $\text{Co}$  sites and  $\text{Co}_2\text{P}$  sites in  $\text{Co}_2\text{P}/\text{Co}$ .

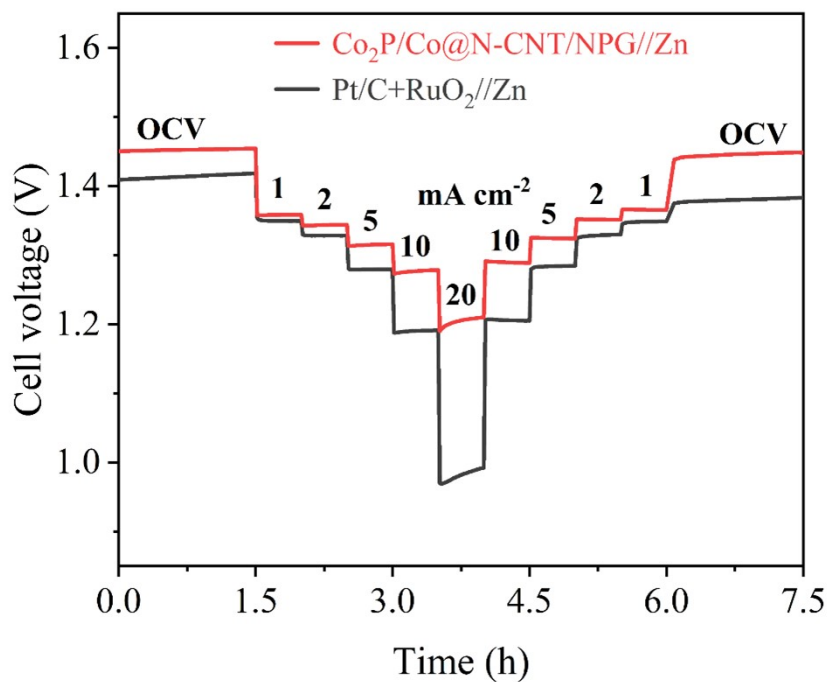

**Fig. S28.** Rate discharge curves the voltage with various current density of the rechargeable ZAB based on the Co<sub>2</sub>P/Co@N-CNT/NPG and Pt/C+RuO<sub>2</sub> cathodes.

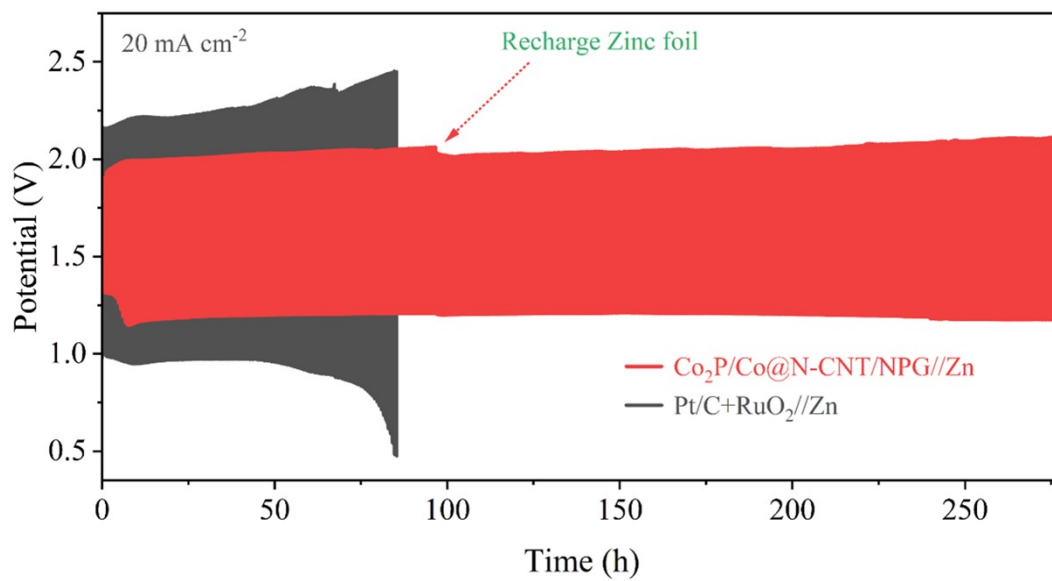

**Fig. S29.** Cycle stability of ZAB at a high current density of  $20 \text{ mA cm}^{-2}$ .



**Table S1.** Elemental composition of as-synthesized catalysts estimated.

| Samples                        | Co (wt.%) | P (wt.%) | N (wt.%) | O (wt.%) | C (wt.%) |
|--------------------------------|-----------|----------|----------|----------|----------|
| Pure NPG                       | -         | 1.32     | 6.84     | 5.46     | 86.38    |
| Co@N-CNT/NG                    | 9.56      | -        | 5.58     | 4.61     | 80.08    |
| Co <sub>2</sub> P/Co@PG        | 12.46     | 4.01     | -        | 5.71     | 77.42    |
| Co <sub>2</sub> P/Co@N-CNT/NPG | 10.24     | 3.75     | 6.45     | 8.70     | 70.85    |

Co, P, N, O, and C contents were detected by XPS analysis.

**Table S2** Compare ORR performance with the most recently reported non-noble metal ORR catalysts in 0.1 M KOH.

| ORR catalysts                                                     | Catalyst loading (mg cm <sup>-2</sup> ) | Onset potential (V vs. RHE) | E <sub>1/2</sub> (V vs. RHE) | n         | References |
|-------------------------------------------------------------------|-----------------------------------------|-----------------------------|------------------------------|-----------|------------|
| Co <sub>2</sub> P/Co@N-CNT/NPG                                    | 0.2                                     | 1.05                        | 0.91                         | 3.95      | This work  |
| 20% Pt/C                                                          |                                         | 1.02                        | 0.89                         | 3.97      |            |
| Co <sub>x</sub> P@N,P-C                                           | 0.28                                    | -                           | 0.82                         | 3.95      | 1          |
| Fe <sub>x</sub> P/NPCS                                            | 0.16                                    | 0.918                       | 0.832                        | 3.98      | 2          |
| MnVO <sub>x</sub> @N-rGO                                          | 0.3                                     | 1.14                        | 0.80                         | ~3.9      | 3          |
| HCA-Co                                                            | -                                       | 0.92                        | 0.87                         | -         | 4          |
| W <sub>2</sub> N/WC                                               | 0.6                                     | 0.93                        | 0.827                        | -         | 5          |
| SHG                                                               | 0.5                                     | 1.01                        | 0.87                         | 3.81-3.96 | 6          |
| NH <sub>4</sub> Co <sub>x</sub> Fe <sub>1-x</sub> PO <sub>4</sub> | 0.35                                    | 0.83                        | 0.74                         | 3.64-4.01 | 7          |
| P single bond HPC                                                 | 0.4                                     | 0.88                        | 0.79                         | 3.5-3.9   | 8          |
| CoP-PBSCF                                                         | 0.25                                    | -                           | 0.752                        | ~4        | 9          |
| Mo <sub>2</sub> C@NC                                              | 0.28                                    | 0.9                         | 0.78                         | -         | 10         |
| 2D-PPCN                                                           | -                                       | 0.92                        | 0.85                         | ~3.6      | 11         |
| Fe-N/C                                                            | 0.1                                     | 0.923                       | 0.809                        | ~3.96     | 12         |
| N,S-CD/rGO                                                        | 0.35                                    | -                           | 0.69                         | 3.90      | 13         |
| Co-NTMCs@NSC                                                      | 0.2                                     | 0.945                       | 0.833                        | 3.91      | 14         |

**Table S3** Compare OER performance with the most recently reported non-noble metal OER catalysts in 1 M KOH.

| OER catalysts                                                     | Catalyst loading<br>(mg cm <sup>-2</sup> ) | Overpotential<br>(mV) | Tafel<br>(mV dec <sup>-1</sup> ) | References |
|-------------------------------------------------------------------|--------------------------------------------|-----------------------|----------------------------------|------------|
| Co <sub>2</sub> P/Co@N-CNT/NPG                                    | 0.2                                        | 309                   | 60.5                             | This work  |
| RuO <sub>2</sub>                                                  |                                            | 341                   | 74.2                             |            |
| Co <sub>x</sub> P@N,P-C                                           | 0.28                                       | 320                   | 87                               | 1          |
| W <sub>2</sub> N/WC                                               | 0.6                                        | 320                   | 94.5                             | 5          |
| SHG                                                               | 0.5                                        | 330                   | 71                               | 6          |
| NH <sub>4</sub> Co <sub>x</sub> Fe <sub>1-x</sub> PO <sub>4</sub> | 0.35                                       | 313                   | 58.92                            | 7          |
| FeP nanorods                                                      | -                                          | 350                   | 63.6                             | 15         |
| VN-Co-P                                                           | -                                          | 335                   | -                                | 16         |
| CP/CTs/Co-S                                                       | -                                          | 308                   | 72                               | 17         |
| CoP/GO                                                            | 0.28                                       | 340                   | 66                               | 18         |
| FeCoNi@Gr                                                         | 0.32                                       | 325                   | 60                               | 19         |
| Ni <sub>3</sub> S <sub>2</sub> /NF                                | -                                          | 312                   | 111                              | 20         |
| Co@NPC-H                                                          | 0.2                                        | 350                   | 57                               | 21         |
| Na <sub>1.95</sub> CoP <sub>2</sub> O <sub>7</sub>                | 0.28                                       | 360                   | 51                               | 22         |
| Co <sub>9</sub> S <sub>8</sub> @MoS <sub>2</sub>                  | 0.4                                        | 342                   | 94                               | 23         |
| PNPC                                                              | 0.28                                       | 313                   | 83.7                             | 24         |

**Table S4** Compare catalytic activities of the reported non-noble bifunctional catalysts for both OER and ORR.

| Both OER and ORR Catalysts                         | Electrolyte (M KOH) | $E_{1/2}$ (V vs. RHE) | $E_{j=10}$ (V vs. RHE) | $\Delta E$ (V vs. RHE) | References |
|----------------------------------------------------|---------------------|-----------------------|------------------------|------------------------|------------|
| Co <sub>2</sub> P/Co@N-CNT/NPG                     |                     | 0.91                  | 1.74                   | 0.82                   |            |
| 20% Pt/C                                           | 0.1                 | 0.89                  | 1.91                   | 1.02                   | This work  |
| RuO <sub>2</sub>                                   |                     | 0.75                  | 1.88                   | 1.13                   |            |
| MnVO <sub>x</sub> @N-rGO                           | 0.1                 | 0.80                  | 1.65                   | 0.85                   | 3          |
| Co@NPC-H                                           | 0.1                 | 0.72                  | 1.58                   | 0.86                   | 21         |
| Na <sub>1.95</sub> CoP <sub>2</sub> O <sub>7</sub> | 0.1                 | 0.73                  | 1.59                   | 0.86                   | 22         |
| SL Ni(OH) <sub>2</sub>                             | 0.1                 | 0.64                  | 1.57                   | 0.93                   | 25         |
| SWCNT@NPC                                          | 1                   | 0.85                  | 1.678                  | 0.83                   | 26         |
| CoV <sub>2-x</sub> Fe <sub>x</sub> O <sub>4</sub>  | 1                   | 0.664                 | ~1.53                  | 0.83                   | 27         |
| Fe <sub>2</sub> P/EWC                              | 0.1                 | 0.83                  | 1.53                   | 0.87                   | 28         |
| CoFe/N-GCT                                         | 0.1                 | 0.79                  | 1.67                   | 0.88                   | 29         |
| NiO/NiCo <sub>2</sub> O <sub>4</sub>               | 0.1                 | 0.73                  | -                      | 0.86                   | 30         |
| Fe <sub>2</sub> Ni <sub>2</sub> N/Co               | 0.1                 | 0.76                  | 1.63                   | 0.87                   | 31         |
| Fe/Fe <sub>3</sub> C@C                             | 1                   | 0.84                  | 1.68                   | 0.84                   | 32         |
| Fe@N-C                                             | 0.1                 | 0.83                  | 1.71                   | 0.88                   | 33         |
| CoNC-CNF                                           | 0.1                 | 0.8                   | 1.68                   | 0.88                   | 34         |
| Ni <sub>3</sub> Fe/N-C                             | 0.1                 | 0.78                  | 1.62                   | 0.84                   | 35         |

**Table S5** Compare HER performance with the most recently reported non-noble metal HER catalysts in 1 M KOH.

| HER catalysts                                    | Catalyst loading<br>(mg cm <sup>-2</sup> ) | Overpotential<br>(mV) | Tafel<br>(mV dec <sup>-1</sup> ) | References |
|--------------------------------------------------|--------------------------------------------|-----------------------|----------------------------------|------------|
| Co <sub>2</sub> P/Co@N-CNT/NPG                   | 0.2                                        | 98                    | 104.6                            | This work  |
| Pt/C                                             | 0.2                                        | 37                    | 61.4                             |            |
| W <sub>2</sub> N/WC                              | 0.6                                        | 148.5                 | 47.4                             | 5          |
| SHG                                              | 0.5                                        | 230                   | 112                              | 6          |
| VN-Co-P                                          |                                            | 137                   | 81                               | 16         |
| CP/CTs/Co-S                                      | -                                          | 190                   | 131                              | 17         |
| CoP/GO                                           | 0.28                                       | 150                   | 38                               | 18         |
| FeCoNi@Gr                                        | 0.32                                       | 211                   | 77                               | 19         |
| Ni <sub>3</sub> S <sub>2</sub> /NF               | -                                          | 131                   | 96                               | 20         |
| Co <sub>9</sub> S <sub>8</sub> @MoS <sub>2</sub> | 0.4                                        | 143                   | 117                              | 23         |
| Co/NBC                                           | -                                          | 117                   | 146                              | 36         |
| NiS/Ni <sub>2</sub> P/CC                         | -                                          | 111                   | 78.1                             | 37         |
| NiCo <sub>2</sub> S <sub>4</sub> NA/CC           | 4                                          | 230                   | 141                              | 38         |
| CoCO <sub>3</sub> @NiFe LDH                      | -                                          | 171                   | 168.2                            | 39         |
| NiSP/NF                                          | -                                          | 93                    | 107                              | 40         |
| N-NiS/NiS <sub>2</sub>                           | -                                          | 185                   | 106                              | 41         |

**Table S6** The comparative performance of the liquid ZAB with recently reported non-noble metal air cathode-based liquid ZAB devices in alkaline electrolytes.

| Air cathode                                                       | OCP (V) | Power density (mW cm <sup>-2</sup> ) | Specific capacity (mAh g <sub>zn</sub> <sup>-1</sup> @mA cm <sup>-2</sup> ) | Energy density (Wh g <sup>-1</sup> @mA cm <sup>-2</sup> ) | Durability (cycles/h @ mA cm <sup>-2</sup> ) | References |
|-------------------------------------------------------------------|---------|--------------------------------------|-----------------------------------------------------------------------------|-----------------------------------------------------------|----------------------------------------------|------------|
| Co <sub>2</sub> P/Co@N-CNT/NPG                                    | 1.458   | 145                                  | 781@10                                                                      | 987.2@10                                                  | 1200/800@10<br>375/275@20                    | This work  |
| Pt/C+RuO <sub>2</sub>                                             | 1.411   | 98                                   | 608@10                                                                      | 728.9@10                                                  | 825/280@10<br>225/75@20                      |            |
| NH <sub>4</sub> Co <sub>x</sub> Fe <sub>1-x</sub> PO <sub>4</sub> | 1.36    | 74.6                                 | 750@10                                                                      | -                                                         | -/30@10                                      | 7          |
| NiO/NiCo <sub>2</sub> O <sub>4</sub>                              | 1.47    | 99.0                                 | 814.4@10                                                                    | 911@10                                                    | -/175@10                                     | 30         |
| Fe/Fe <sub>3</sub> C@C                                            | 1.37    | 101.3                                | 682.6@10                                                                    | 764.5@10                                                  | 297/99@10                                    | 32         |
| Fe@N-C                                                            | ~1.40   | 220                                  | -                                                                           | -                                                         | 100/-@10                                     | 33         |
| Ni <sub>3</sub> Fe/N-C                                            | -       | -                                    | 528@10                                                                      | ~634@10                                                   | 420/105@10                                   | 35         |
| CoFeN-NCNTs//CCM                                                  | 1.455   | 145                                  | 778.4@10                                                                    | -                                                         | 1355/445@10                                  | 42         |
| N-GCNT/FeCo                                                       | 1.48    | 89.3                                 | 872.2@100                                                                   | 653@100                                                   | 240/40@10                                    | 3          |
| Co <sub>4</sub> N@NC                                              | 1.49    | 98.6                                 | 644.3@10                                                                    | 736.2@10                                                  | 200/-@10                                     | 44         |
| CoS <sub>x</sub> /NCNTs/Ni                                        | 1.45    | 131                                  | -                                                                           | -                                                         | 200/200@5                                    | 45         |
| Co <sub>2</sub> SiO <sub>4</sub> /N-C                             | 1.412   | 138.2                                | -                                                                           | -                                                         | 600/400@5                                    | 46         |
| Co-VN-NC                                                          | 1.44    | 237.8                                | -                                                                           | -                                                         | -                                            | 47         |
| Fe <sub>0.5</sub> Co <sub>0.5</sub> O <sub>x</sub> /NrGO          | 1.43    | 86                                   | 709@25                                                                      | 806@25                                                    | 120/120@25                                   | 48         |

**Table S7** The comparative performance of the solid-state flexible ZAB with recently reported non-noble metal air cathode-based solid-state flexible ZAB devices.

| Air cathode                                              | OCV (V) | Durability<br>(cycles/h@mA cm <sup>-2</sup> ) | References |
|----------------------------------------------------------|---------|-----------------------------------------------|------------|
| Co <sub>2</sub> P/Co@N-CNT/NPG                           | 1.415   | 615/205@5                                     | This work  |
| Pt/C+RuO <sub>2</sub>                                    | 1.392   | 210/70@5                                      |            |
| HCA-Co                                                   | 1.4     | 50/33.3@1                                     | 4          |
| QAFCGO                                                   | ~1.4    | 30/10@1                                       | 49         |
| Fe-Co <sub>4</sub> N@N-C                                 | 1.34    | 45/-@4                                        | 50         |
| Co <sub>4</sub> N/CNW/CC                                 | 1.4     | 408/136@10                                    | 51         |
| NC-Co SA                                                 | 1.41    | 125/42@10                                     | 52         |
| CoFe/N-GCT                                               | 1.48    | 1600/270@2                                    | 53         |
| LaNiO <sub>3</sub> /NCNT                                 | 1.3     | 120/25@-                                      | 54         |
| NiCo <sub>2</sub> O <sub>4</sub> @MnO <sub>2</sub> -CNTs | 1.36    | 540/9@3                                       | 55         |
| DN-CP@G                                                  | 1.34    | 170/170@1                                     | 56         |
| P-O/FeN <sub>4</sub> -CNS                                | 1.41    | -/20@25                                       | 57         |
| CC@VG                                                    | 1.38    | 108/36@2                                      | 58         |
| Fe <sub>3</sub> N-CNS                                    | 1.38    | 60/10@5                                       | 59         |
| Fe-N <sub>x</sub> -C                                     | 1.49    | -/120@1                                       | 60         |
| CoNCNTF/CNF                                              | 1.34    | 68/11@0.5                                     | 61         |



**Table S8** The comparative performance of the overall water splitting with recently reported non-noble metal electrode-based water splitting devices in 1 M KOH.

| Catalysts                              | Overpotential at 10 mV cm <sup>-2</sup><br>(V) | References |
|----------------------------------------|------------------------------------------------|------------|
| Co <sub>2</sub> P/Co@N-CNT/NPG         | 1.66                                           | This work  |
| Pt/C+RuO <sub>2</sub>                  | 1.54                                           |            |
| SHG                                    | 1.68                                           | 6          |
| CP/CTs/Co-S                            | 1.74                                           | 17         |
| CoP/GO                                 | 1.7                                            | 18         |
| FeCoNi@Gr                              | 1.687                                          | 19         |
| Ni <sub>3</sub> S <sub>2</sub> /NF     | 1.68                                           | 20         |
| Co/NBC                                 | 1.68                                           | 36         |
| NiS/Ni <sub>2</sub> P/CC               | 1.67                                           | 37         |
| NiCo <sub>2</sub> S <sub>4</sub> NA/CC | 1.68                                           | 38         |
| CoCO <sub>3</sub> @NiFe LDH            | 1.67                                           | 39         |
| NiSP/NF                                | 1.7                                            | 40         |
| N-NiS/NiS <sub>2</sub>                 | 1.74                                           | 41         |
| NiCoP-NiCoSe <sub>2</sub>              | 1.7                                            | 62         |
| Co <sub>9</sub> S <sub>8</sub> /CC     | 1.74                                           | 63         |
| NiSe <sub>2</sub>                      | 1.7                                            | 64         |

## References

1. Q. Shi, Q. Liu, Y. Zheng, Y. Dong, L. Wang, H. Liu, W. Yang, *Energy Environ. Mater.* **2022**, 5, 515.
2. K. Hu, Z. Xiao, Y. Cheng, D. Yan, R. Chen, J. Huo, S. Wang, *Electrochim. Acta* **2017**, 254, 280.
3. X. Xing, R. Liu, K. Cao, U. Kaiser, G. Zhang, C. Streb, *ACS Appl. Mater. Interfaces* **2018**, 10, 44511.
4. C. Zhu, Y. Ma, W. Zang, C. Guan, X. Liu, S. J. Pennycook, J. Wang, W. Huang, *J. Chem. Eng.* **2019**, 369, 988.
5. J. Diao, Y. Qiu, S. Liu, W. Wang, K. Chen, H. Li, W. Yuan, Y. Qu, X. Guo, *Adv. Mater.* **2020**, 32, 1905679.
6. C. Hu, L. Dai, *Adv. Mater.* **2017**, 29, 1604942.
7. D.-S. Pan, P. Chen, L.-L. Zhou, J.-H. Liu, Z.-H. Guo, J.-L. Song, *J. Power Sources* **2021**, 498, 229859.
8. J. Wu, R. Yang, W. Yan, *Int. J. Hydrog. Energy* **2019**, 44, 12941.
9. Y.-Q. Zhang, H.-B. Tao, Z. Chen, M. Li, Y.-F. Sun, B. Hua, J.-L. Luo, *J. Mater. Chem. A* **2019**, 7, 26607.
10. Z. Cheng, Q. Fu, Q. Han, Y. Xiao, Y. Liang, Y. Zhao, L. Qu, *Adv. Funct. Mater.* **2018**, 28, 1705967.
11. W. Lei, Y.-P. Deng, G. Li, Z. P. Cano, X. Wang, D. Luo, Y. Liu, D. Wang, Z. Chen, *ACS Catal.* **2018**, 8, 2464.
12. L. Lin, Q. Zhu, A.-W. Xu, *J. Am. Chem. Soc.* **2014**, 136, 11027.
13. P. Zhang, J.-S. Wei, X.-B. Chen, H.-M. Xiong, *J. Colloid Interface Sci.* **2019**, 537, 716.
14. X. Zhu, J. Dai, L. Li, Z. Wu, S. Chen, *Nanoscale* **2019**, 11, 21302.
15. D. Xiong, X. Wang, W. Li, L. Liu, *Chem. Commun.* **2016**, 52, 8711.
16. H. Yang, Y. Hu, D. Huang, T. Xiong, M. Li, M. S. Balogun, Y. Tong, *Mater. Today* **2019**, 11, 1.
17. J. Wang, H.-x. Zhong, Z.-l. Wang, F.-l. Meng, X.-b. Zhang, *ACS Nano* **2016**, 10, 2342.
18. L. Jiao, Y.-X. Zhou, H.-L. Jiang, *Chemical Science* **2016**, 7, 1690.
19. Y. Yang, Z. Lin, S. Gao, J. Su, Z. Lun, G. Xia, J. Chen, R. Zhang, Q. Chen, *ACS Catal.* **2017**, 7, 469.
20. G. Ren, Q. Hao, J. Mao, L. Liang, H. Liu, C. Liu, J. Zhang, *Nanoscale* **2018**, 10, 17347.

21. Y.-N. Hou, Z. Zhao, H. Zhang, C. Zhao, X. Liu, Y. Tang, Z. Gao, X. Wang, J. Qiu, *Carbon* **2019**, 144, 492.
22. L. Gui, X. Miao, C. Lei, K. Wang, W. Zhou, B. He, Q. Wang, L. Zhao, *Eur. J. Chem.* **2019**, 25, 11007.
23. Y. J. Feng, T. He, N. A. Vante, *Chem. Mater.* **2008**, 20, 26.
24. Z. Xu, Q. Zhang, M. Li, F. Luo, Y. Liu, R. Wang, X. Ma, Z. Yang, D. Zhang, *ChemCatChem* **2020**, 12, 5534.
25. H. B. Gray, *Nat. Chem.* **2009**, 1, 7.
26. J.-C. Li, P.-X. Hou, M. Cheng, C. Liu, H.-M. Cheng, M. Shao, *Carbon* **2018**, 139, 156.
27. K. Chakrapani, G. Bendt, H. Hajiyani, T. Lunkenbein, M. T. Greiner, L. Masliuk, S. Salamon, J. Landers, R. Schlögl, H. Wende, R. Pentcheva, S. Schulz, M. Behrens, *ACS Catal.* **2018**, 8, 1259.
28. K. Sun, J. Li, L. Huang, S. Ji, P. Kannan, D. Li, L. Liu, S. Liao, *J. Power Sources* **2019**, 412, 433.
29. X. Liu, L. Wang, P. Yu, C. Tian, F. Sun, J. Ma, W. Li, H. Fu, *Angew. Chem. Int. Ed.* **2018**, 57, 16166.
30. Z. Zhang, X. Liang, J. Li, J. Qian, Y. Liu, S. Yang, Y. Wang, D. Gao, D. Xue, *ACS Appl. Mater. Interfaces* **2020**, 12, 21661.
31. M. Wu, G. Zhang, J. Qiao, N. Chen, W. Chen, S. Sun, *Nano Energy* **2019**, 61, 86.
32. Q. Wang, Y. Lei, Z. Chen, N. Wu, Y. Wang, B. Wang, Y. Wang, *J. Mater. Chem. A* **2018**, 6, 516.
33. J. Wang, H. Wu, D. Gao, S. Miao, G. Wang, X. Bao, *Nano Energy* **2015**, 13, 387.
34. W. Zhang, X. Yao, S. Zhou, X. Li, L. Li, Z. Yu, L. Gu, *Small* **2018**, 14, 1800423.
35. G. Fu, Z. Cui, Y. Chen, Y. Li, Y. Tang, J. B. Goodenough, *Adv. Energy Mater.* **2017**, 7, 1601172.
36. M.-R. Liu, Q.-L. Hong, Q.-H. Li, Y. Du, H.-X. Zhang, S. Chen, T. Zhou, J. Zhang, *Adv. Funct. Mater.* **2018**, 28, 1801136.
37. X. Xiao, D. Huang, Y. Fu, M. Wen, X. Jiang, X. Lv, M. Li, L. Gao, S. Liu, M. Wang, C. Zhao, Y. Shen, *ACS Appl. Mater. Interfaces* **2018**, 10, 4689.
38. D. Liu, Q. Lu, Y. Luo, X. Sun, A. M. Asiri, *Nanoscale* **2015**, 7, 15122.
39. R. Que, S. Liu, P. He, Y. Yang, Y. Pan, *Materials Letters* **2020**, 277, 128285.
40. R. A. Marquez-Montes, K. Kawashima, Y. J. Son, J. A. Weeks, H. H. Sun, H. Celio, V. H. Ramos-Sánchez, C. B. Mullins, *J. Mater. Chem. A* **2021**, 9, 7736.

41. H. Liu, Z. Liu, F. Wang, L. Feng, *J. Chem. Eng.* **2020**, 397, 125507.
42. G. Zhou, G. Liu, X. Liu, Q. Yu, H. Mao, Z. Xiao, L. Wang, *Adv. Funct. Mater.* **2022**, 32, 2107608.
43. C. Y. Su, H. Cheng, W. Li, Z. Q. Liu, N. Li, Z. Hou, F. Q. Bai, H. X. Zhang, T. Y. Ma, *Adv. Energy Mater.* **2017**, 7, 1602420.
44. L. Chen, Y. Zhang, X. Liu, L. Long, S. Wang, X. Xu, M. Liu, W. Yang, J. Jia, *Carbon* **2019**, 151, 10.
45. L.-N. Lu, Y.-L. Luo, H.-J. Liu, Y.-X. Chen, K. Xiao, Z.-Q. Liu, *J. Chem. Eng.* **2022**, 427, 132041.
46. X. Guo, S. Zheng, Y. Luo, H. Pang, *J. Chem. Eng.* **2020**, 401, 126005.
47. Z. Li, X. Wang, J. Liu, C. Gao, L. Jiang, Y. Lin, A. Meng, *ACS Sustain. Chem. Eng.* **2020**, 8, 3291.
48. L. Wei, H. E. Karahan, S. Zhai, H. Liu, X. Chen, Z. Zhou, Y. Lei, Z. Liu, Y. Chen, *Adv. Mater.* **2017**, 29, 1701410.
49. J. Zhang, J. Fu, X. Song, G. Jiang, H. Zarrin, P. Xu, K. Li, A. Yu, Z. Chen, *Adv. Energy Mater.* **2016**, 6, 1600476.
50. Q. Xu, H. Jiang, Y. Li, D. Liang, Y. Hu, C. Li, *Appl. Catal. B: Environ.* **2019**, 256, 117893.
51. F. Meng, H. Zhong, D. Bao, J. Yan, X. Zhang, *J. Am. Chem. Soc.* **2016**, 138, 10226.
52. W. Zang, A. Sumboja, Y. Ma, H. Zhang, Y. Wu, S. Wu, H. Wu, Z. Liu, C. Guan, J. Wang, S. J. Pennycook, *ACS Catal.* **2018**, 8, 8961.
53. X. Liu, L. Wang, P. Yu, C. Tian, F. Sun, J. Ma, W. Li, H. Fu, *Angew. Chem. Int. Ed.* **2018**, 57, 16166.
54. J. Fu, D. U. Lee, F. M. Hassan, L. Yang, Z. Bai, M. G. Park, Z. Chen, *Adv. Mater.* **2015**, 27, 5617.
55. N. Xu, Y. Cai, L. Peng, J. Qiao, Y.-D. Wang, W. M. Chirdon, X.-D. Zhou, *Nanoscale* **2018**, 10, 13626.
56. C. Hang, J. Zhang, J. Zhu, W. Li, Z. Kou, Y. Huang, *Adv. Energy Mater.* **2018**, 8, 1703539.
57. H. Sun, S. Liu, M. Wang, T. Qian, J. Xiong, C. Yan, *ACS Appl. Mater. Interfaces* **2019**, 11, 33054.
58. B. Zhang, E. Zhang, S. Wang, Y. Zhang, Z. Ma, Y. Qiu, *J. Colloid Interface Sci.* **2019**, 543, 84.

59. M. Wang, S. Liu, N. Xu, T. Qian, C. Yan, *Adv. Sustain. Syst.* **2017**, 1, 1700085.
60. J. Han, X. Meng, L. Lu, J. Bian, Z. Li, C. Sun, *Adv. Funct. Mater.* **2019**, 29, 1808872.
61. D. Ji, L. Fan, L. Li, N. Mao, X. Qin, S. Peng, S. Ramakrishna, *Carbon* **2019**, 142, 379.
62. T. Wang, X. Liu, Z. Yan, Y. Teng, R. Li, J. Zhang, T. Peng, *ACS Sustain. Chem. Eng.* **2020**, 8, 1240.
63. P. Hao, W. Zhu, L. Li, J. Tian, J. Xie, F. Lei, G. Cui, Y. Zhang, B. Tang, *Electrochim. Acta* **2020**, 338, 135883.
64. H. Liang, L. Li, F. Meng, L. Dang, J. Zhuo, A. Forticaux, Z. Wang, S. Jin, *Chem. Mater.* **2015**, 27, 5702.
